# Supplementary material
Source: Springer Nature journal article supplement (http://www.springermedizin.de/resource/supplementary/12885_2007_810_MOESM6_ESM.pdf/9470388)
Supplement: MOESM6 [file 9470388]

## POSH: Diagnosis Information

Date Of Birth:

Hospital:

Height (m):

Weight (Kg):

Clinician:

Ethnic Origin:

Hospital Number:

### Section 1 - Menopausal Status

Please tick the status that applies

#### Menopausal Status

- Premenopausal
- Perimenopausal
- Postmenopausal
- Unknown

### Section 2 - Presentation

Please tick the appropriate presentation then any sites of distant metastatic disease that apply

#### Presentation

- Incidental at breast reduction appointment
- Incidental at Breast Reduction Mammogram
- Incidental at Mastectomy
- Incidental at reconstruction
- Routine Follow-up and imaging
- Screen detected-Mammogram
- Screen detected-MRI
- Screen detected-Sonogram
- Symptomatic

#### Sites Of Distant Metastatic Disease At Presentation

- Bone
- Bone Marrow
- Brain Meninges
- Brain Parenchyma
- Liver
- Lung Parenchyma
- Lung Pleura
- Mediastinal Lymph Nodes
- Other
- Ovary
- Pericardium
- Peritoneum
- Retroperitoneal Lymph Nodes
- Supraclavicular Lymph Nodes

*If 'other', please specify:*

### Section 3 - Scan Results

Please write the result and location of any scans performed

#### Scan Results

|            | Result | Location of scan (Hospital) |
|------------|--------|-----------------------------|
| Mammogram  |        |                             |
| MRI        |        |                             |
| PET        |        |                             |
| Ultrasound |        |                             |

### Section 4 - Location Of Tumor

Please tick the location representing the site and side of the tumor

#### Site and side of tumor

- left
- left behind nipple
- Left Lower Inner Quadrant
- Left Lower Outer Quadrant
- left multi-quadrant
- Left Upper Inner Quadrant
- Left Upper Outer Quadrant
- right
- right behind nipple
- Right Lower Inner Quadrant
- Right Lower Outer Quadrant
- right multi-quadrant
- Right Upper Inner Quadrant
- Right Upper Outer Quadrant
- Unknown

### Section 5 - Basis Of Diagnosis

Please tick the relevant basis of diagnosis prior to definitive surgery

#### Basis Of Diagnosis

- Clinical
- Cytology
- Excision
- Histology core biopsy
- Histology excision biopsy
- Pathological Examination
- Radiology

Date Of Birth:  
Hospital:

Height (m):  
Weight (Kg):  
Clinician:

Ethnic Origin:  
Hospital Number:

**Section 6 - Required Documents**

Please tick and return the ticked documents with this form

**Copies of the following documents must be provided**

|                                       | Enclosed                 | Not Done                 |
|---------------------------------------|--------------------------|--------------------------|
| Cytology Report                       | <input type="checkbox"/> | <input type="checkbox"/> |
| Imaging - Mammo Report                | <input type="checkbox"/> | <input type="checkbox"/> |
| Imaging - MRI Report                  | <input type="checkbox"/> | <input type="checkbox"/> |
| Imaging - Sonno Report                | <input type="checkbox"/> | <input type="checkbox"/> |
| Initial Clinical Assessment           | <input type="checkbox"/> | <input type="checkbox"/> |
| Pathology - Core Biopsy Report        | <input type="checkbox"/> | <input type="checkbox"/> |
| Pathology - Definitive Surgery Report | <input type="checkbox"/> | <input type="checkbox"/> |
| Pathology - Excision Biopsy Report    | <input type="checkbox"/> | <input type="checkbox"/> |
